# Supplementary material
Source: PubMed Central journal article supplement (PMC2800246)
Supplement: cwp158_1.pdf [file cwp158_1.pdf]

**Supplementary Figure 1. Kinetics of GnT-Vb toward different oligosaccharide acceptors.**

Recombinant soluble GnT-Vb secreted from HEK-293 cells was partially purified on a nickel chelating column (see Fig 1), concentrated, and subjected to kinetic analysis. Lineweaver-Burk plots of activity of GnTVb were obtained as a function of: (a) UDP-GlcNAc concentration; (b), octyl-trisaccharide concentration; (c), asialo-agalacto-biantennary glycan concentration; d), benzyl-Man-GlcNAc concentration; (e), GlcNAc-O-Man glycopeptide concentration.

**Supplementary Fig. 2. Kinetics of GnT-V toward different oligosaccharide acceptors.**

Recombinant soluble GnT-V expressed in Chinese hamster ovary cells (Kamar, M., Alvarez-Manilla, G., et al. 2004) was purified and subjected to kinetic analysis. Lineweaver-Burk plots of activity of GnT-V were obtained as a function of: (a) UDP-GlcNAc concentration; (b), octyl-trisaccharide concentration; (c), asialo-agalacto-biantennary glycan concentration; (d), benzyl-Man-GlcNAc concentration; (e), GlcNAc-O-Man glycopeptide concentration.

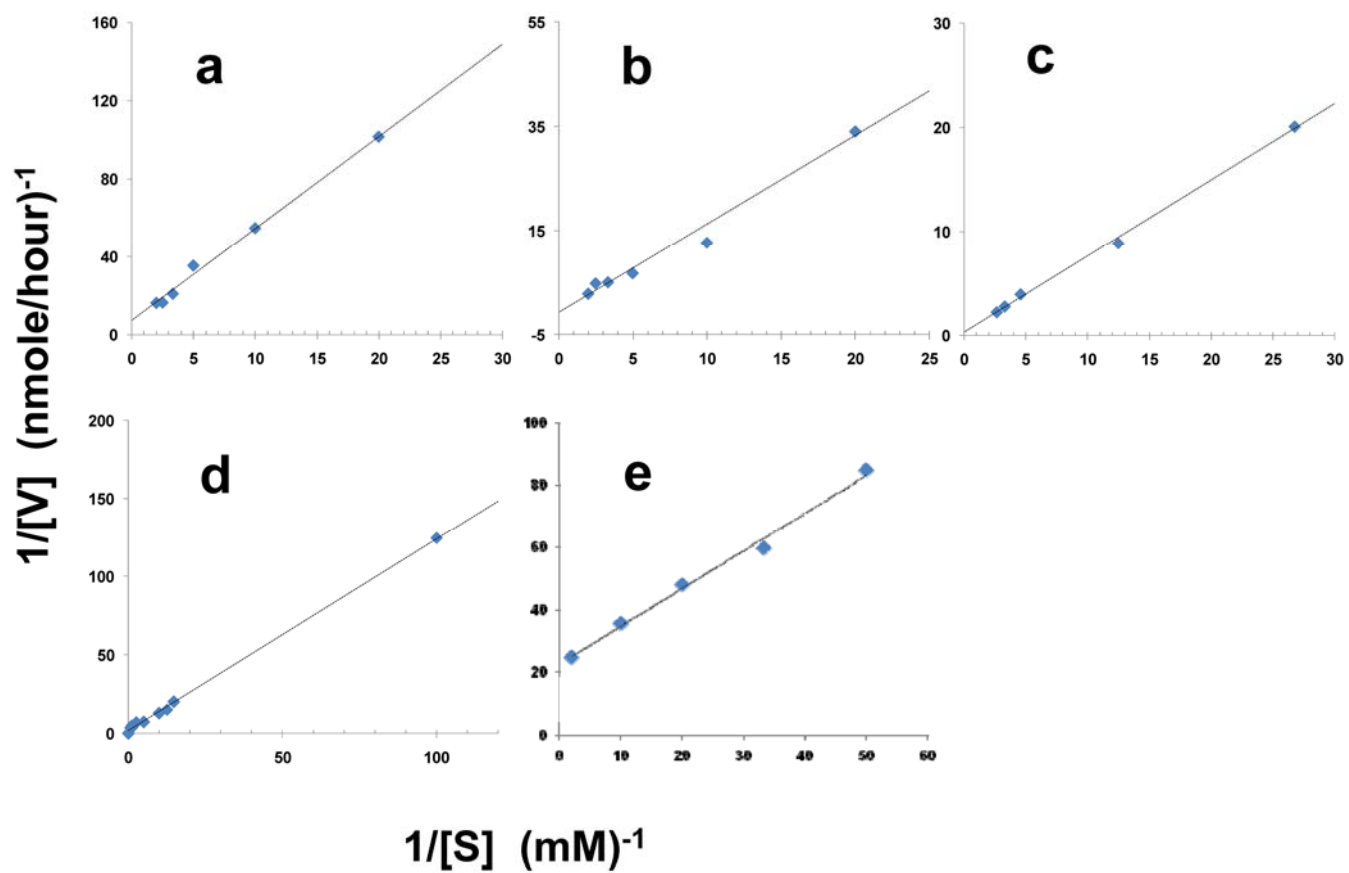

Supplementary Figure 1

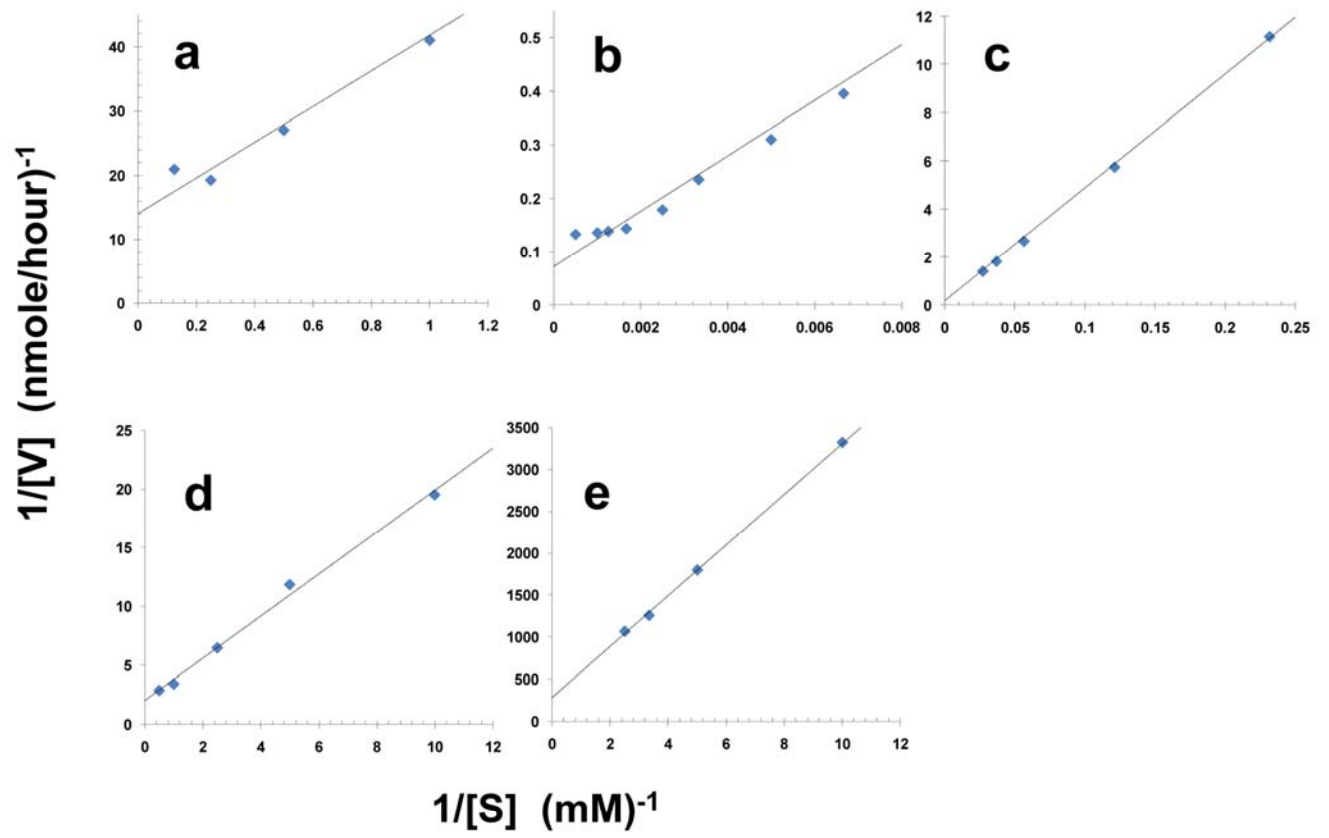

Supplementary Figure 2
